# Supplementary material for: Universal probe-based SNP genotyping with visual readout: a robust and versatile method
Source: Royal Society of Chemistry journal article supplement (doi:10.1039/d3nr01950k), 2023-01-01
Supplement: d3nr01950k1.pdf [file d3nr01950k1.pdf]

1 Supporting Information

2

3 **Universal probe-based SNP genotyping with visual readout: a robust**  
4 **and versatile method**

5 *Zhongzhong Wang, Zhang Zhang, Wang Luo, Luoia Wang, Xiaole Han, Rong Zhao,*  
6 *Xin Liu, Jianhong Zhang, Wen Yu, Junjie Li, Yujun Yang\*, Chen Zuo\* and Guoming*  
7 *Xie\**

8

9

10

11

12

13

14

15

16

17

18

19

20

21

22

23

24

25

26

27

28

29

30

31

32

33

34

35

36

37

38

39

40

41

42 **S1 Tables**

43

44

45 Table S1. Rs671 related primer sequences.

| Name         | Oligonucleotide Sequence (5'-3')                  | Size (bp) |
|--------------|---------------------------------------------------|-----------|
| Sequencing-F | ACTTTGGGGCAATACAGGGG                              | 20        |
| Sequencing-R | CAGCAGGTCCTGAACTTCCA                              | 20        |
| FP-G         | CCCACACTCACAGTTTTCACTTC                           | 23        |
| FP-A         | CCCACACTCACAGTTTTCACTTT                           | 23        |
| RP           | ACTTTGGGGCAATACAGGGG                              | 20        |
| LP-G         | GGAGGATCACTCCAAGTACTAGACTACCCACACTCACAGTTTTCACTTC | 46        |
| LP-A         | ATCATCAGGTCTGGAAGATTACGCCACACTCACAGTTTTCACTTT     | 46        |
| LP-R         | CTTCTTTCAGAGGTCAGGTGTATACTTTGGGGCAATACAGGGG       | 43        |
| Wild-Probe   | GGAGGATCACTCCAAGTACTAGACTA-FAM                    | 23        |
| Mutant-Probe | ATCATCAGGTCTGGAAGATTACG-Digoxin                   | 23        |
| Shared-Probe | CTTCTTTCAGAGGTCAGGTGTAT-Biotin                    | 23        |

46 FP: forward primer; RP: reverse primer; LP: long primer.

47

48

49 Table S2. MTHFR A1298C related primer sequences.

| Name         | Oligonucleotide Sequence (5'-3')                  | Size(bp) |
|--------------|---------------------------------------------------|----------|
| Sequencing-F | TCTCCCTTTGCCATGTCCAC                              | 20       |
| Sequencing-R | CAGGGGCAATTCCTCTTCCC                              | 20       |
| FP-A         | GGGGAGGAGCTGACCAGTGAAGT                           | 23       |
| FP-C         | GGGGAGGAGCTGACCAGTGAAGG                           | 23       |
| RP           | TCTCCCTTTGCCATGTCCACAGC                           | 23       |
| LP-A         | GGAGGATCACTCCAAGTACTAGACTAGGGGAGGAGCTGACCAGTGAAGT | 46       |
| LP-C         | ATCATCAGGTCTGGAAGATTACGGGGAGGAGCTGACCAGTGAAGG     | 46       |
| LP-R         | CTTCTTTCAGAGGTCAGGTGTATTCTCCCTTTGCCATGTCCACAGC    | 46       |

50

51

52 Table S3. MTHFR C677T related primer sequences.

| Name         | Oligonucleotide Sequence (5'-3')                  | Size(bp) |
|--------------|---------------------------------------------------|----------|
| Sequencing-F | CCCTCACCTGGATGGGAAAG                              | 20       |
| Sequencing-R | AAGATCAGAGCCCCAAAGC                               | 20       |
| FP-C         | AAGCTGCGTGATGATGAAATCGC                           | 23       |
| FP-T         | AAGCTGCGTGATGATGAAATCGT                           | 23       |
| RP           | TGCAAGATCAGAGCCCCAAAGC                            | 23       |
| LP-C         | GGAGGATCACTCCAAGTACTAGACTAAAGCTGCGTGATGATGAAATCGC | 46       |
| LP-T         | ATCATCAGGTCTGGAAGATTACGAAGCTGCGTGATGATGAAATCGT    | 46       |
| LP-R         | CTTCTTTCAGAGGTCAGGTGTATTGCAAGATCAGAGCCCCAAAGC     | 46       |

53

54

55 Table S4. MTRR A66G related primer sequences.

| Name         | Oligonucleotide Sequence (5'-3')               | Size(bp) |
|--------------|------------------------------------------------|----------|
| Sequencing-F | GTGTGGGTATTGTTGCATTGTTTC                       | 24       |
| Sequencing-R | GTGGTGGTATTAGTGCCTTTTGTT                       | 25       |
| FP-A         | CATGTACCACAGCTTGCTCACAT                        | 23       |
| FP-G         | CATGTACCACAGCTTGCTCACAC                        | 23       |
| RP           | GTGTGGGTATTGTTGCATTGTTT                        | 23       |
| LP-A         | GGAGGATCACTCCAAGTAGACTACATGTACCACAGCTTGCTCACAT | 46       |
| LP-G         | ATCATCAGGTCTGGAAGATTACGCATGTACCACAGCTTGCTCACAC | 46       |
| LP-R         | CTTCTTTCAGAGGTCAGGTGTATGTGTGGGTATTGTTGCATTGTTT | 46       |

56

57

58 Table S5. Comparison of typing formula and sequencing results of rs671 in 50 cases.

| Sample Number | Genotype based on typing formula | Genotype based on Sequencing |
|---------------|----------------------------------|------------------------------|
| 1             | GG                               | GG                           |
| 2             | GG                               | GG                           |
| 3             | GG                               | GG                           |
| 4             | GG                               | GG                           |
| 5             | GG                               | GG                           |
| 6             | GG                               | GG                           |
| 7             | GG                               | GG                           |
| 8             | GG                               | GG                           |
| 9             | GG                               | GG                           |
| 10            | GG                               | GG                           |
| 11            | GG                               | GG                           |
| 12            | GG                               | GG                           |
| 13            | GG                               | GG                           |
| 14            | GG                               | GG                           |
| 15            | GG                               | GG                           |
| 16            | GG                               | GG                           |
| 17            | GA                               | GA                           |
| 18            | GG                               | GG                           |
| 19            | GA                               | GA                           |
| 20            | GG                               | GG                           |
| 21            | GA                               | GA                           |
| 22            | GA                               | GA                           |
| 23            | GG                               | GG                           |
| 24            | GA                               | GA                           |
| 25            | GA                               | GA                           |
| 26            | GG                               | GG                           |
| 27            | GG                               | GG                           |

|    |    |    |
|----|----|----|
| 28 | GG | GG |
| 29 | GA | GA |
| 30 | GA | GA |
| 31 | GG | GG |
| 32 | GA | GA |
| 33 | GG | GG |
| 34 | GG | GG |
| 35 | GG | GG |
| 36 | GG | GG |
| 37 | GG | GG |
| 38 | AA | AA |
| 39 | GG | GG |
| 40 | GG | GG |
| 41 | GG | GG |
| 42 | GA | GA |
| 43 | GG | GG |
| 44 | GG | GG |
| 45 | GA | GA |
| 46 | GA | GA |
| 47 | GG | GG |
| 48 | GG | GG |
| 49 | GA | GA |
| 50 | GA | GA |

59

60

61 Table S6. Comparison of MTHFR C677T, MTHFR A1298C and MTRR A66G typing results

| Sample Number | Genotype based on typing formula |       |      | Genotype based on Sequencing |       |      |
|---------------|----------------------------------|-------|------|------------------------------|-------|------|
|               | A1298C                           | C677T | A66G | A1298C                       | C677T | A66G |
| 1             | AC                               | CT    | AA   | AC                           | CT    | AA   |
| 2             | AA                               | CT    | AA   | AA                           | CT    | AA   |
| 3             | AA                               | CT    | AA   | AA                           | CT    | AA   |
| 4             | CC                               | TT    | AA   | CC                           | TT    | AA   |
| 5             | AC                               | CC    | AG   | AC                           | CC    | AG   |
| 6             | AC                               | CC    | AG   | AC                           | CC    | AG   |
| 7             | AC                               | CC    | AG   | AC                           | CC    | AG   |
| 8             | AC                               | CC    | GG   | AC                           | CC    | GG   |

62

63

64

65

66

67

68

69

70 S2 Figures

71

72

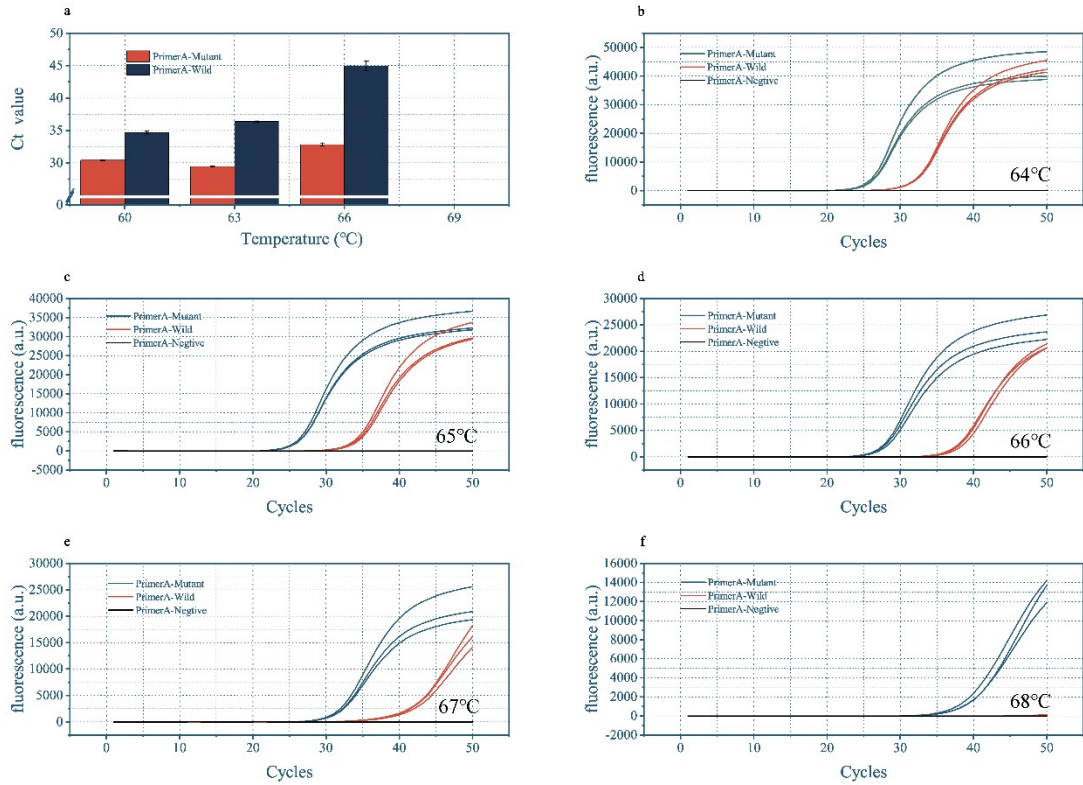

**Fig S1.** Effect of temperature on reaction specificity and efficiency: a: The comparison of specific (orange) and non-specific (dark blue) Ct values yielded the optimum temperature of approximately 64-68°C. b-f: Primer A amplified GG and AA at 64-68°C. 66°C was selected as the optimum temperature.

73

74

75

76

77

78

79

80

81

82

83

84

85

86

87

88

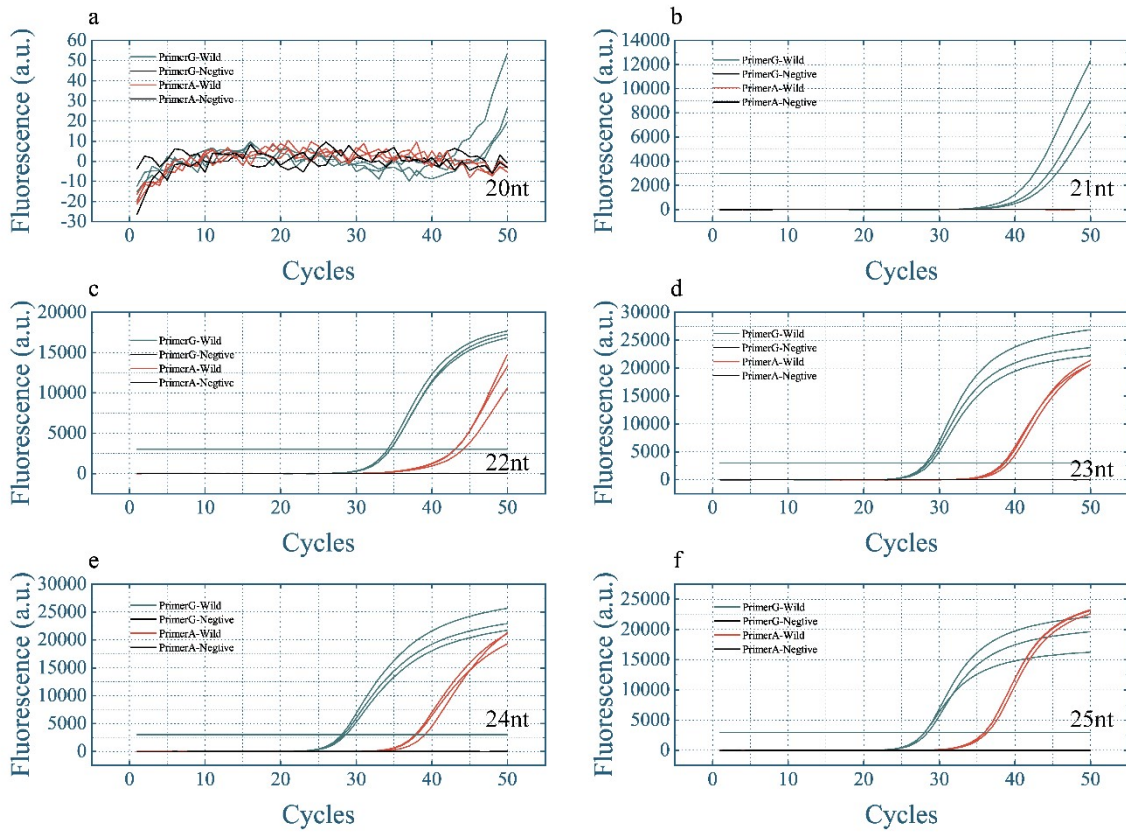

**Fig S2.** Effect of primer length on the reaction: a-f: reaction efficiency and specificity for primers of length 20-25nt. Among them, the efficiency and specificity of length 23nt is the most suitable.

89  
90

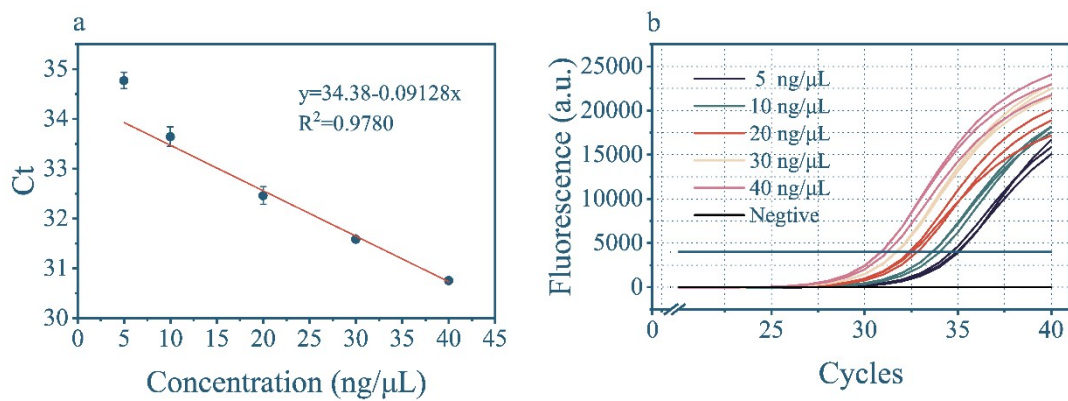

**Fig S3.** The resulting standard curve generated by plotting the target concentration versus threshold cycle(a); Amplification curves(b).

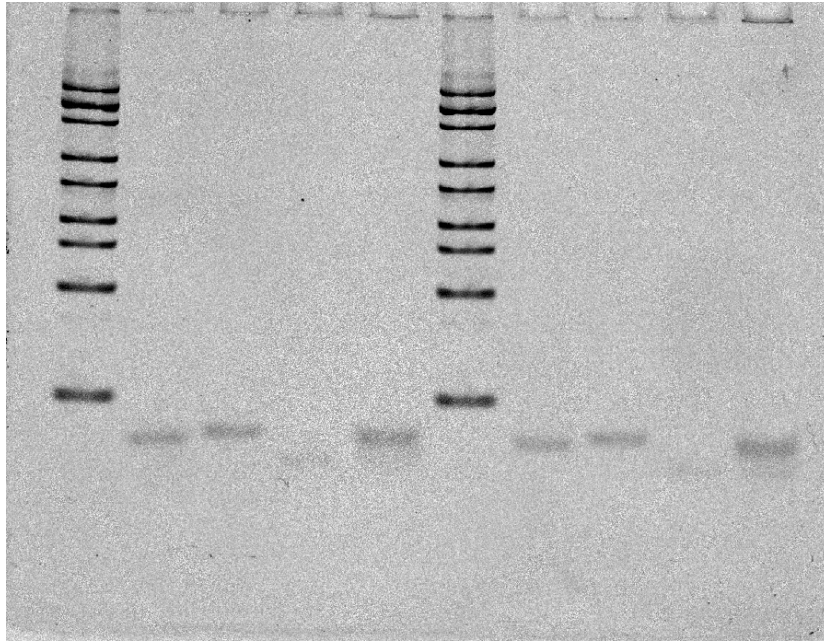

**Fig S4.** PAGE to verify probe dimerization (two parallel experiments). From left to right: biotin probe, digoxin probe, FAM probe, amplification of the three probes.

91  
92  
93  
94  
95  
96  
97  
98  
99  
100  
101  
102  
103  
104  
105  
106  
107  
108  
109  
110  
111  
112  
113  
114  
115  
116

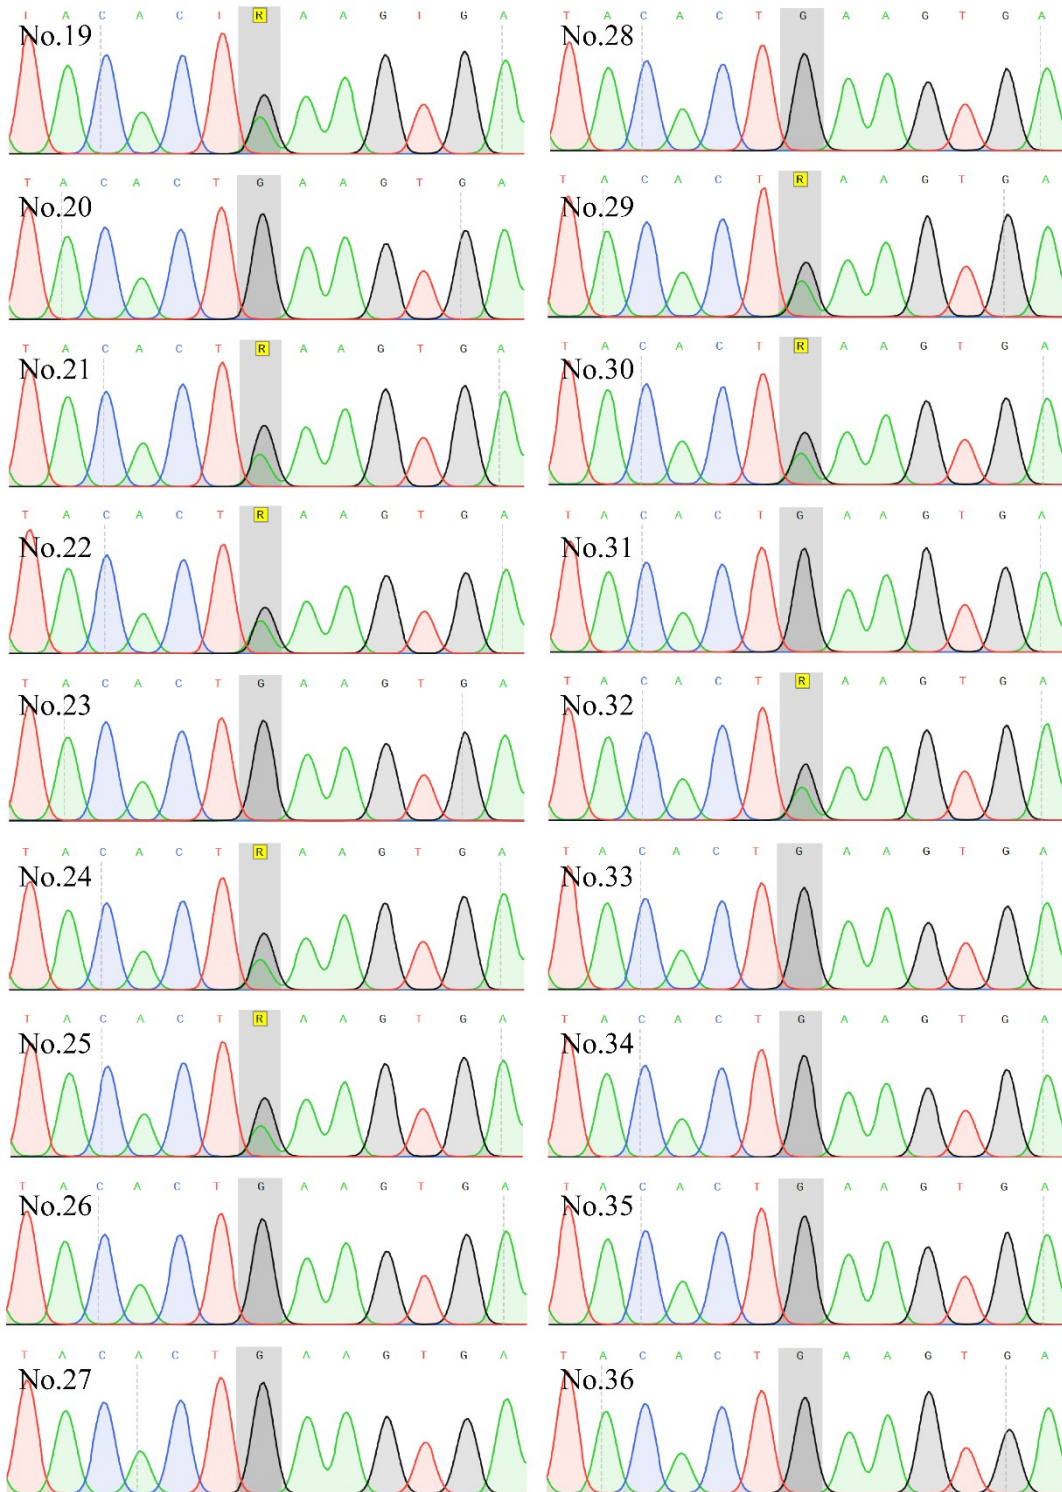



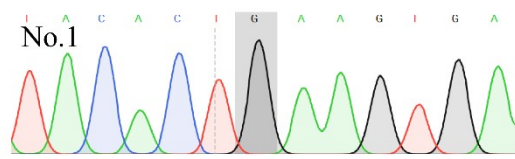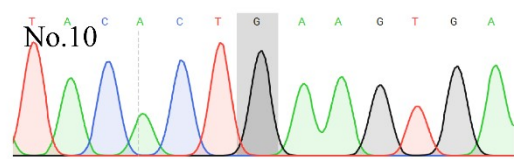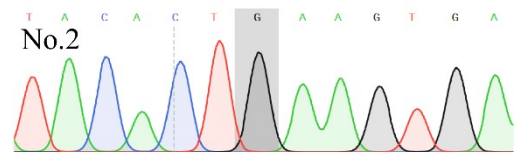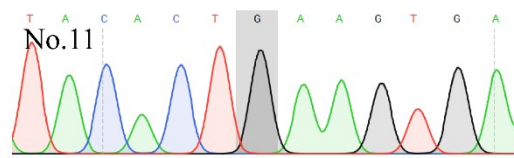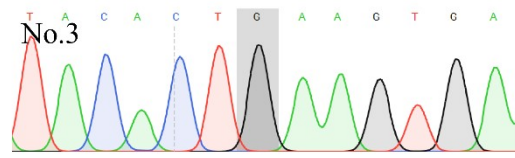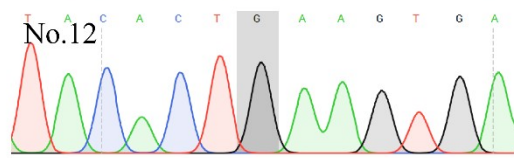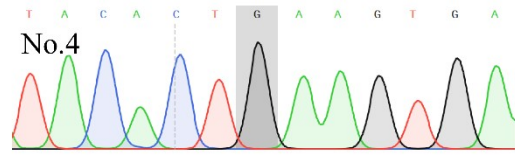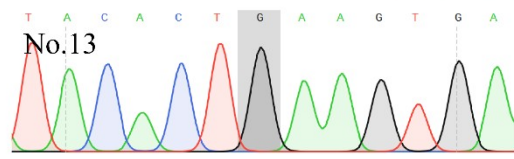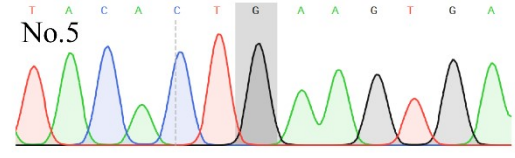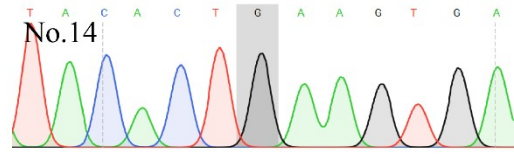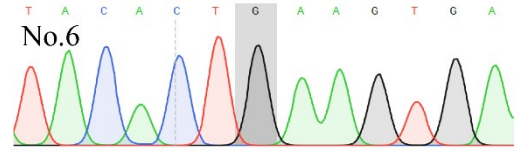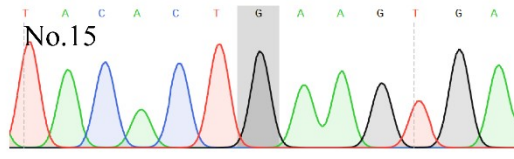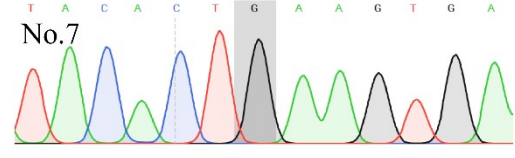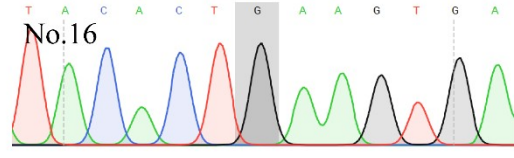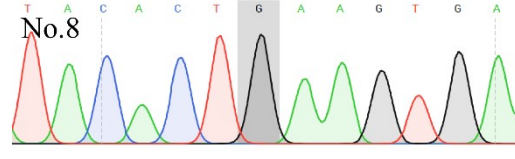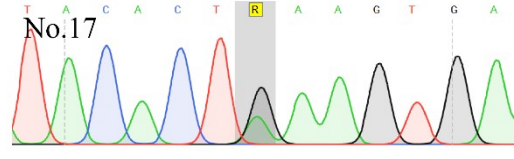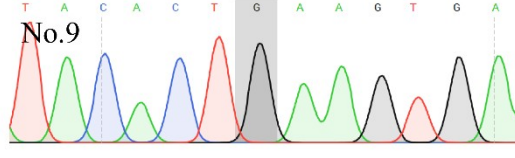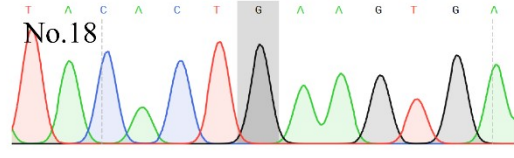

121  
122

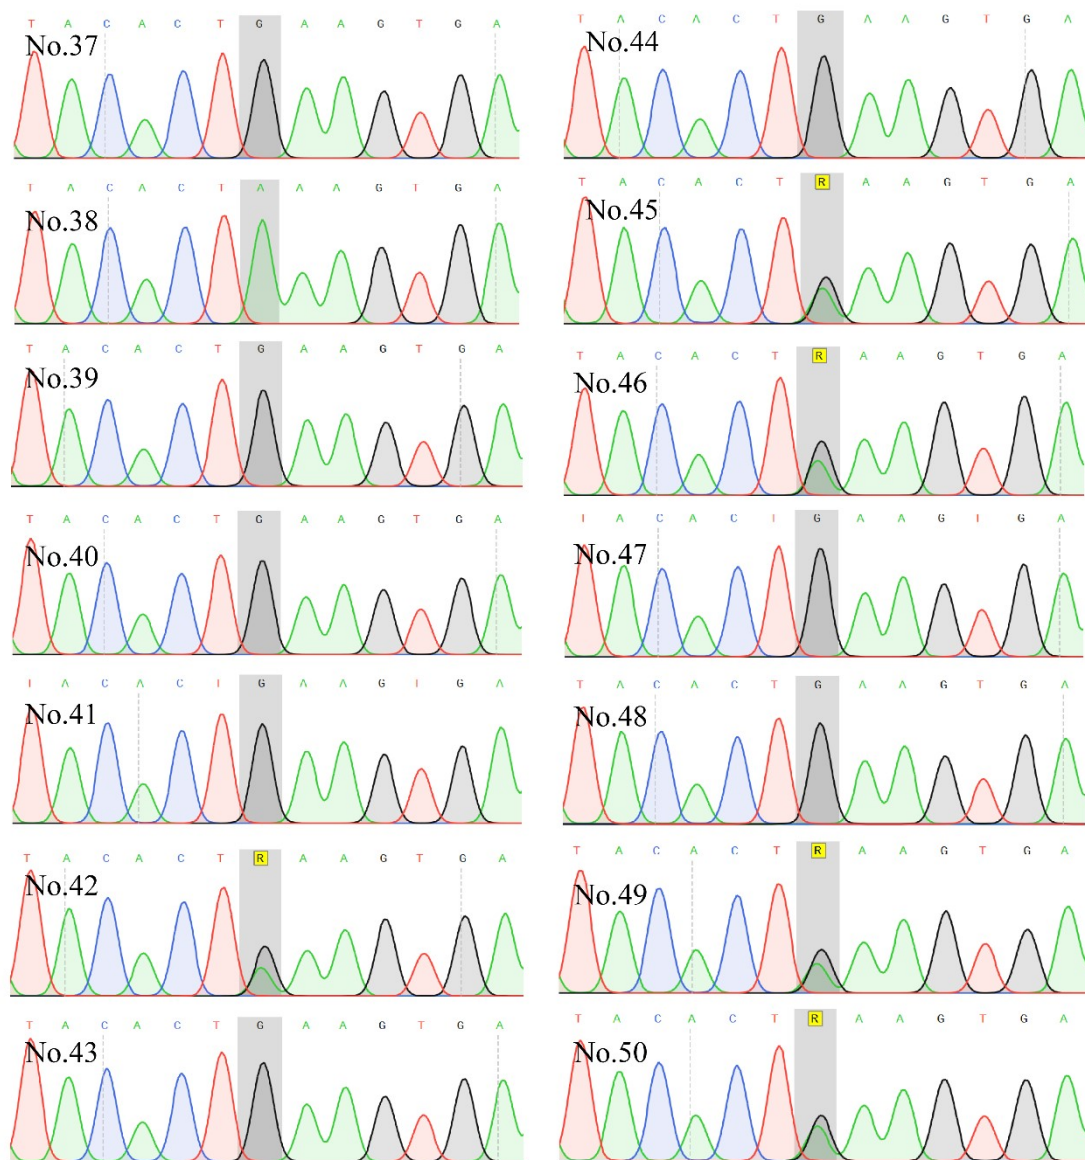

**Fig S5.** Sequencing results of rs671 blood gDNA in 50 cases. (The degenerate base R represents A/G)

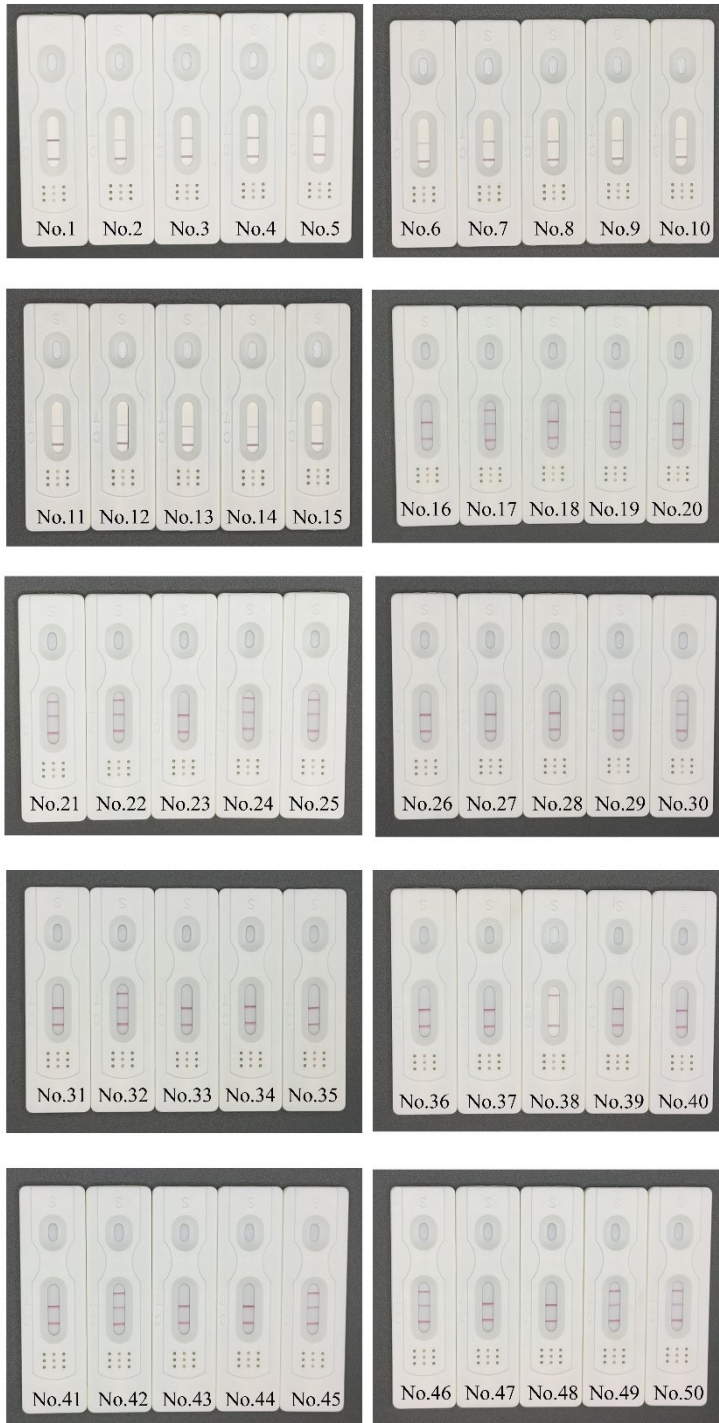

**Fig S6.** LFTS results of rs671 blood gDNA in 50 cases. (The first 15 results were left for too long, more than four months, and the strips had varying degrees of discoloration.)

# MTHFR A1298C

# MTHFR C677T

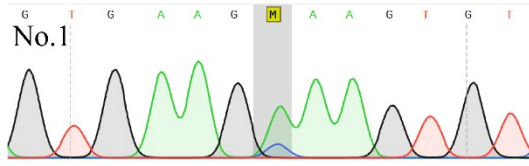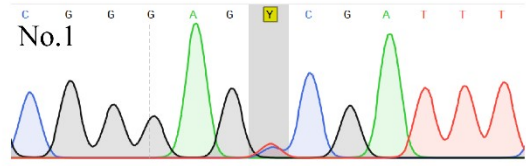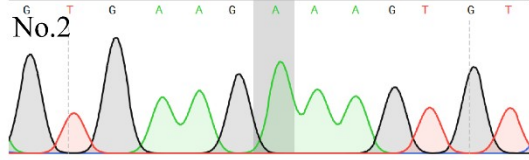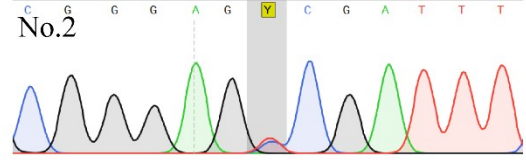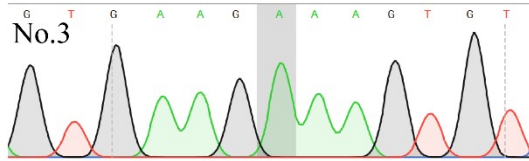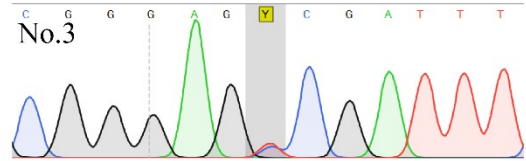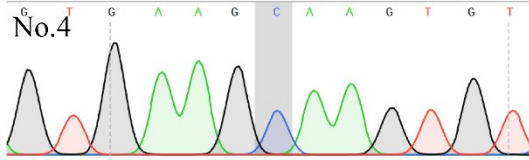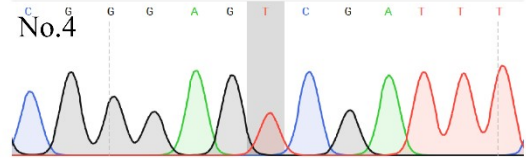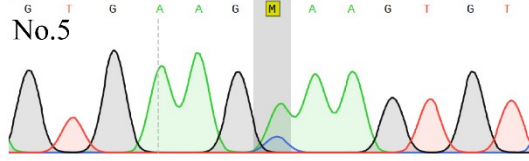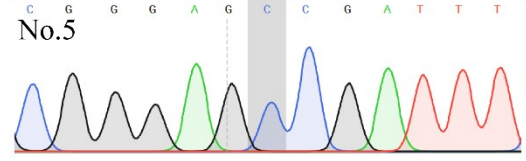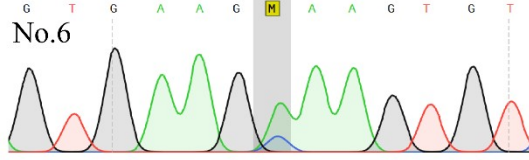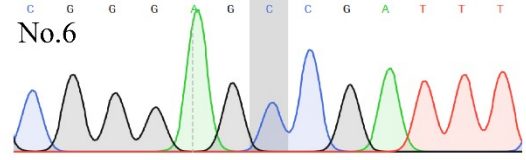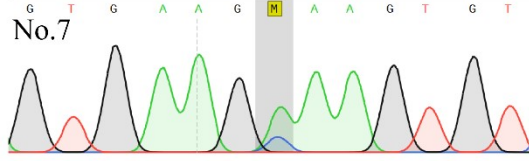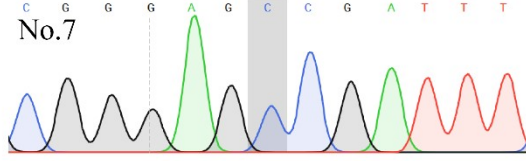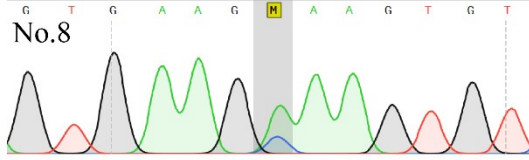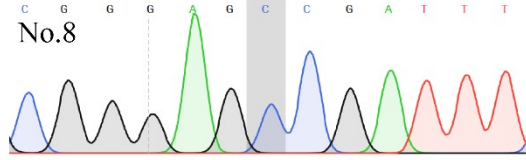

## MTRR A66G

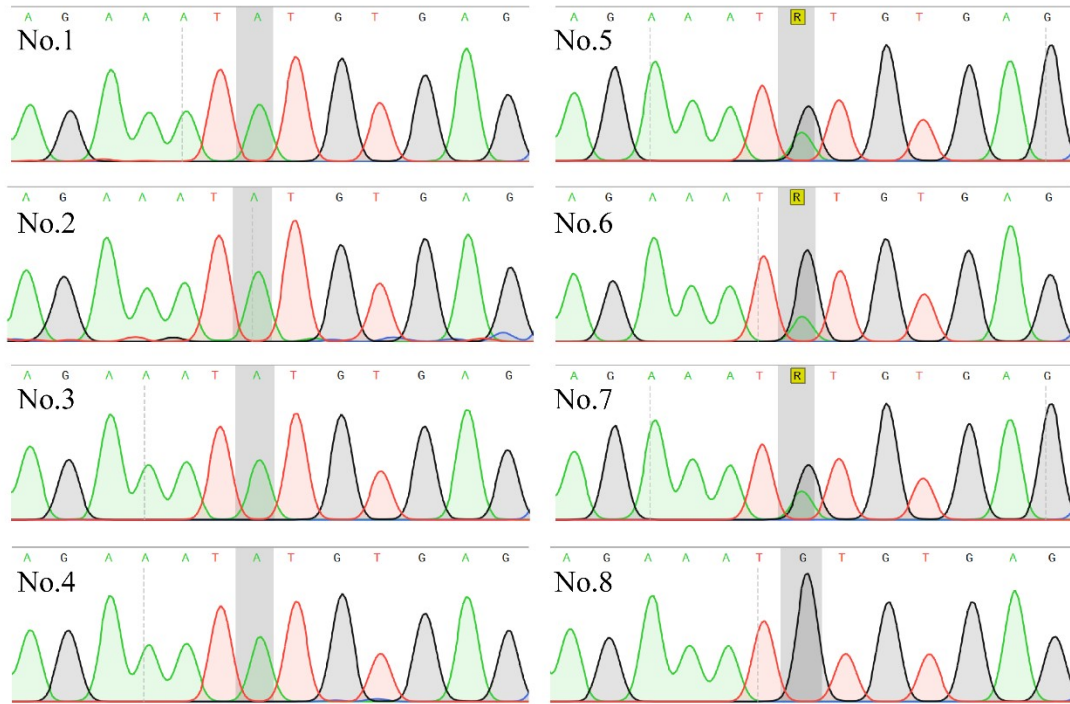

126

**Fig S7.** Sequencing results of MTHFR A1298C, MTHFR C677T, MTRR A66G blood gDNA in 8 cases each. (The degenerate base R represents A/G; Y represents C/T; M represents A/C)

127

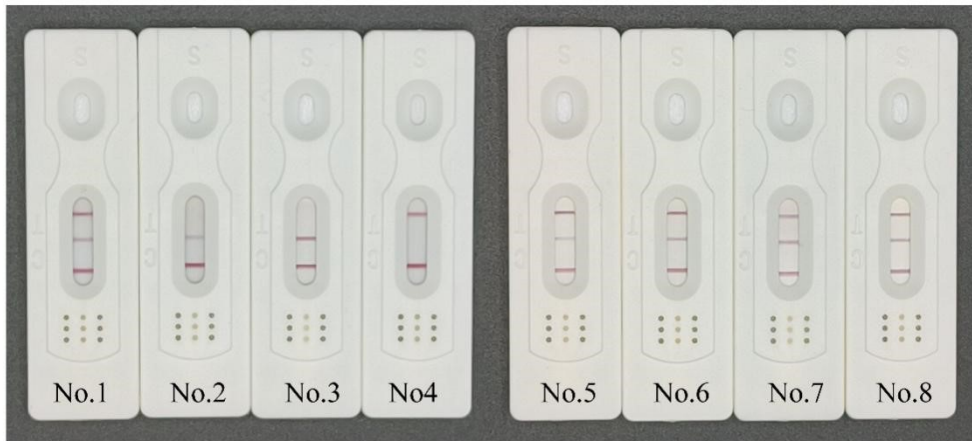

A1298C

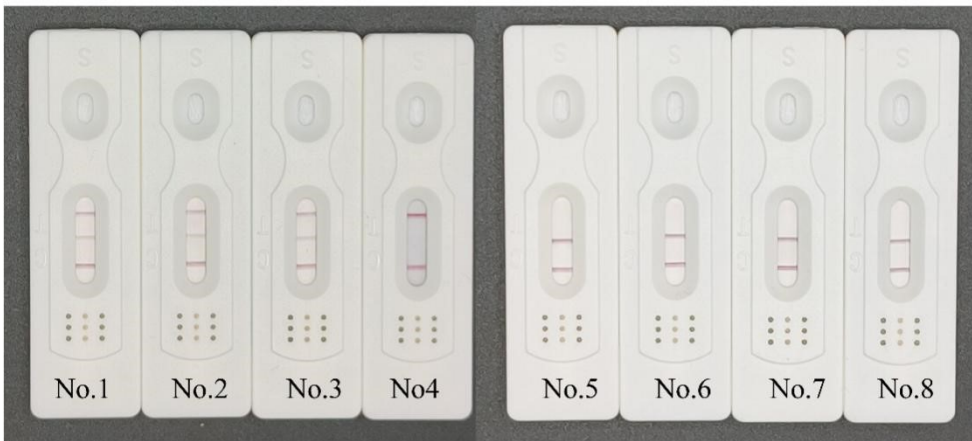

C677T

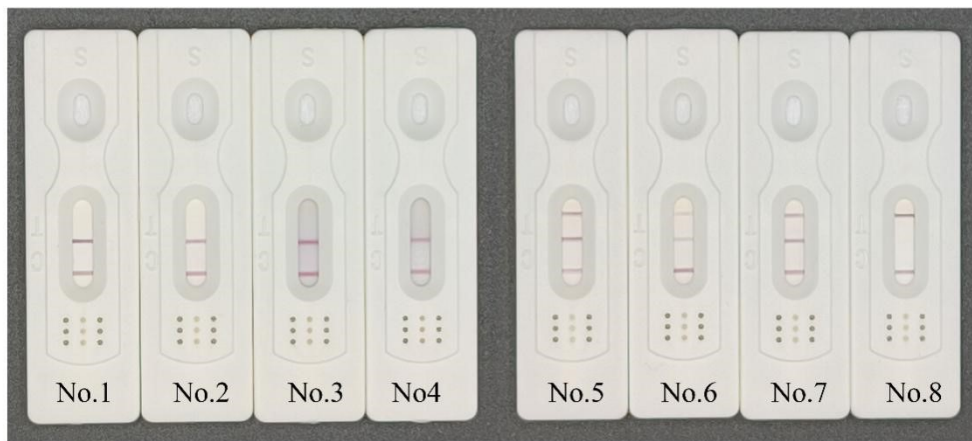

A66G

**Fig S8.** LFTS results of MTHFR A1298C, MTHFR C677T, MTRR A66G blood gDNA.
